# Supplementary material
Source: HighWire-hosted journal article supplement (https://cmajopen.ca/highwire/filestream/81109/field_highwire_adjunct_files/2/Reviewer_comments_2018-0043.pdf)
Supplement: Reviewer_comments_2018-0043.pdf [file Reviewer_comments_2018-0043.pdf]

| Article details: 2018-0043                 |                                                                                                                                                                                                                                                                                                                                                                                                                                                                                                                                                                                                                                                                                                                                                                                                                                                                                                                                                                                                                                                                                                                                                     |
|--------------------------------------------|-----------------------------------------------------------------------------------------------------------------------------------------------------------------------------------------------------------------------------------------------------------------------------------------------------------------------------------------------------------------------------------------------------------------------------------------------------------------------------------------------------------------------------------------------------------------------------------------------------------------------------------------------------------------------------------------------------------------------------------------------------------------------------------------------------------------------------------------------------------------------------------------------------------------------------------------------------------------------------------------------------------------------------------------------------------------------------------------------------------------------------------------------------|
| Title                                      | Children referred for tuberculosis medical surveillance in Ontario, Canada: a single cohort study                                                                                                                                                                                                                                                                                                                                                                                                                                                                                                                                                                                                                                                                                                                                                                                                                                                                                                                                                                                                                                                   |
| Authors                                    | Catherine Yang BHSc, Abdool S. Yasseen III MSc, Jennifer Stimec MD, Elizabeth Rae MD, Valerie Waters MD MSc, Ray Lam NP, Shaun K. Morris MD, Ian Kitai MB Bch                                                                                                                                                                                                                                                                                                                                                                                                                                                                                                                                                                                                                                                                                                                                                                                                                                                                                                                                                                                       |
| Reviewer 1                                 | G. Mahara                                                                                                                                                                                                                                                                                                                                                                                                                                                                                                                                                                                                                                                                                                                                                                                                                                                                                                                                                                                                                                                                                                                                           |
| Institution                                | National Academy of Medical Sciences, Bir Hospital, General Medicine, Kathmandu, Nepal                                                                                                                                                                                                                                                                                                                                                                                                                                                                                                                                                                                                                                                                                                                                                                                                                                                                                                                                                                                                                                                              |
| General comments (author response in bold) | <p>Dear Author</p> <p>here is minor correction should be revised before going forward.<br/>Line: 67 25 years...or only 25?<br/><b>Thank you for the suggestion. We have changed the wording to 25 years.</b></p> <p>Line; 71: IGRA write full form when it appears the first time.<br/><b>Thank you. This has been done</b></p> <p>Write down clear and detail about the procedure of the statistical analysis, for example; univariate and multivariate analysis including descriptive analysis with dependent and independent variables information.<br/><b>Thank you for the suggestion. An analysis section has been added to the methods section as suggested.</b></p> <p>Make a heading for the conclusion after limitation part.<br/><b>This has been done</b></p> <p>Don't write " We believe that a better system needs ....., instated of this you can write this study suggest that or recommend....<br/><b>Thank you. This has been done.</b></p> <p>Strictly follow the STROBE Statement— a checklist of items and revised accordingly.<br/><b>Thank you- the STROBE guide has been appended and we have tried to follow this.</b></p> |
| Reviewer 2                                 | Kentaro Iwata                                                                                                                                                                                                                                                                                                                                                                                                                                                                                                                                                                                                                                                                                                                                                                                                                                                                                                                                                                                                                                                                                                                                       |
| Institution                                | Division of Infectious Diseases, Kobe University Hospital, Kobe City, Hyogo Prefecture, Japan                                                                                                                                                                                                                                                                                                                                                                                                                                                                                                                                                                                                                                                                                                                                                                                                                                                                                                                                                                                                                                                       |
| General comments (author response in bold) | <p>Well described and discussed retrospective analysis on TB evaluation among immigrants in Ontario, Canada. The study data urges the reconsideration on the current evaluation system. I consider the manuscript clinically relevant and important.</p> <p>Minor points</p> <p>line 198 onehad should read one had<br/><b>Thank you. This has been corrected</b></p> <p>table 1 f11 should read 11<br/><b>Thank you; this has been altered.</b></p>                                                                                                                                                                                                                                                                                                                                                                                                                                                                                                                                                                                                                                                                                                |
